# Supplementary material for: Determinants of Sexual Abuse among Adolescents in Public Senior Secondary Schools in Gwagwalada Area Council, Federal Capital Territory, Abuja, Nigeria
Source: Research Square preprint supplement (doi:10.21203/rs.3.rs-8647392/v1), 2026-02-17
Supplement: Supplementary file 1 [file 8ae54c3911934b65b080db29.docx]

**PREVALENCE PATTERN DETERMINANTS AND CONSEQUENCES OF SEXUAL ABUSE AMONG ADOLESCENTS IN PUBLIC SENIOR SECONDARY SCHOOLS IN GWAGWALADA FCT-ABUJA.**

**QUESTIONAIRE**

**Section A―Socio Demographic Characteristics of Respondents**

1. Age (at last birthday) ---------------
2. Sex (a) Male (b) Female (c) others
3. Class (a) SSS1 (b) SSS2 (C) SSS3
4. Tribe (a) Igbo (b) Hausa (c) Yoruba (d) Others
5. Who do you live with (a) Both parents (b) one parent (c) Relatives (d) Others
6. Mother’s education level (a) No Formal Education (b) Primary Level of Education (c)

Secondary Level of Education (d) Tertiary Level of Education

1. Father’s education level (a) No Formal Education(b) Primary Level of Education

(c) Secondary Level of Education (d) Tertiary Level of Education

8) Mother’s occupation (a) Civil Servant (b) Farmer (c) Business(d) Housewife (e) Students

8) Father’s occupation (a) Civil Servant (b) Farmer (c) Business (d) Housewife (e) Students

**Section B―Prevalence of child sexual abuse**

9) Have you ever been sexually abused before? (a) Yes [ ] (b) No [ ]

10) If yes, how many times? (a) Once [ ] (b) twice [ ] (c) three times [ ] (d) four times [ ] (e) Many 11a) How were you abused (Child sexual Abuse (CSA) without physical contact) (a)Forced to look at the genitalia (b) Forced to show naked body (c) Forced to watch pornography (d) Pictures of nude body taken against will (e) Shared pictures of self to others against will

(12b) Child Sexual Abuse with physical contact but without penetration (a) Touched against will with sexual intention (b)Forced to kiss someone (c) Forced penetration with finger, someone tried to but did not succeed (d) Forced vaginal intercourse against will, someone tried but did not succeed(e) Forced anal intercourse, someone tried to but did not succeed (f) Forced oral intercourse, someone tried to but did not succeed (g) Forced into prostitution

(12c) Child Sexual Abuse with penetration (a) Forced penetration with finger or object (b) Forced vaginal intercourse (c) Forced anal intercourse (d) Forced oral intercourse

**Section C- Pattern of Child Sexual Abuse**

**(**13**)** Who were the persons that sexually abused you (multiple response applicable) (a)Parent (b) Family member (c) Boyfriend/Girlfriend (d) Teacher (e) Neighbour (f) Stranger (g) Others

(14) What Age were you at your first Abuse? -----------------------------------------

(15) Where did the event took place? (a) At home (b) At Perpetrator’s home (c) At school

(d) At public place (e) Others

(16) Frequency of occurrence (a) Once (b) 2–5 times (c) 6–10 times(d) More than 10 times

(17) Are you still experiencing abuse? (a) Yes (b) No

(18) Do you still feel bad about the incident (a) Yes (b) No

(19) Did you report to the authorities? (a) Yea (b) No

**Section D- Consequences of Child Sexual Abuse**

(20) How often do you feel anxious or worried due to personal experiences or stories of sexual

abuse? (a) Very often (b) Sometimes (c) Rarely (d) Never

(21) Have you or someone you know experienced any of the following after sexual abuse?

(Check all that apply) (a) Depression (b)Anxiety (c) Feelings of shame or guilt (d) Loss of

trust in others (e) Difficulty concentrating in school (f) Isolation from friends and family

1. Suicidal thoughts (h) Others

(22) Do you think sexual abuse affects academic performance? (a)Yes (b) No (c) I don’t know

(23) Have you noticed any changes in your attitude or behavior since hearing about or

experiencing sexual abuse? (a) Yes (b) No (c) I’m not sure (d) (If yes) Please

describe these changes (open-ended)

(24) Do you think sexual abuse can lead to physical health issues (e.g., injuries, infections)?

1. Yes (b) No (c) I don’t know

(25) Have you or someone you know suffered any physical health issues after sexual abuse?

1. Yes (b) No (c) I don’t know (d) (If yes) What kind of health issues? (open-ended)

(26) Do you think sexual abuse can lead to unintended pregnancies or sexually transmitted

infections (STIs)? (a) Yes (b) No (c) I don’t know

(27) In your opinion, how does sexual abuse affect the social life of a victim?

1. Victim may become isolated (b) Victim may face stigma or discrimination

(c) Victim may change friends or stop socializing (d) No effect (e) Other, please specify…….

(28) Have you noticed any stigma or discrimination in your school or community toward victims

Of sexual abuse? (a) Yes (b) No (c) I’m not sure
